# Supplementary material
Source: PubMed Central journal article supplement (PMC4197882)
Supplement: embr0015-0714-sd1.pdf [file embr0015-0714-sd1.pdf]

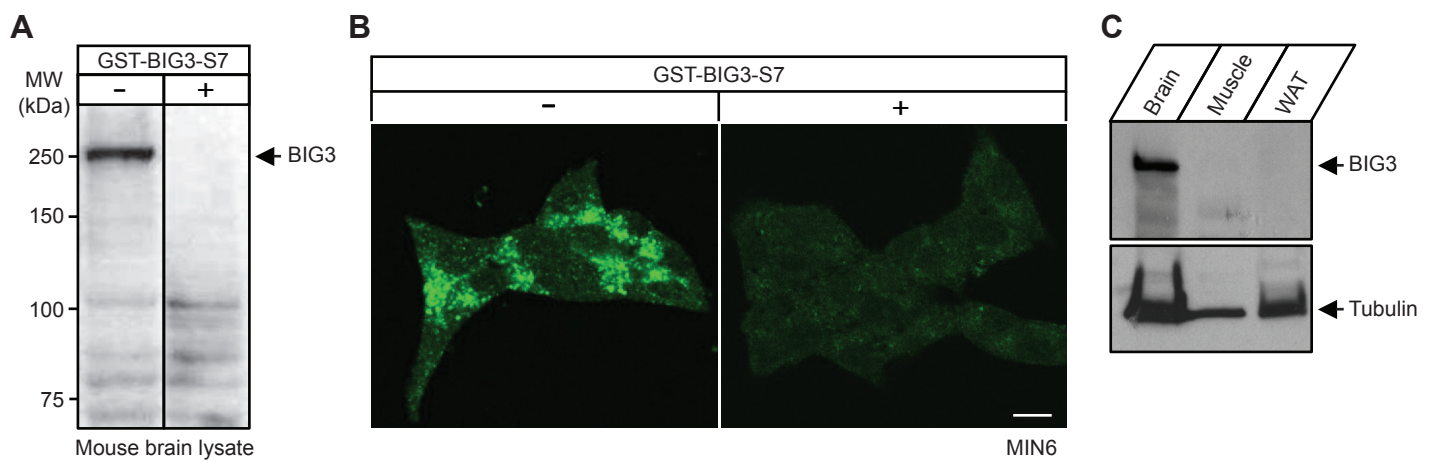

**Figure S1. Generation and testing of a BIG3 antibody.**

(A-B) A GST-fused BIG3 fragment (GST-BIG3-S7) was used to immunize rabbits, and an affinity-purified antibody was tested with (A) Western blot of mouse brain lysates and (B) Immunofluorescent staining of MIN6 cells. Scale bar = 10  $\mu$ m.

(C) Expression profile of BIG3 in brain, skeletal muscle (Muscle) and white adipose tissue (WAT). Tubulin was used as a loading control.
