# Supplementary material
Source: PubMed Central journal article supplement (PMC4197882)
Supplement: embr0015-0714-sd2.pdf [file embr0015-0714-sd2.pdf]

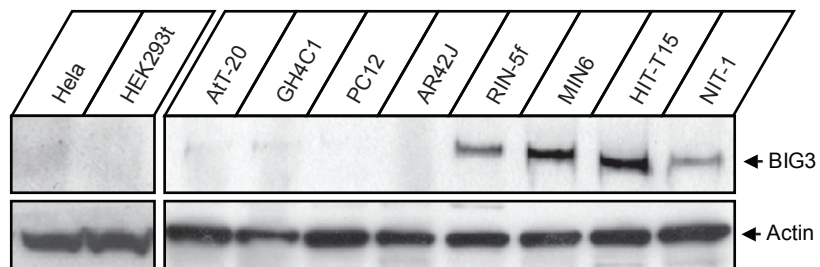

**Figure S2. BIG3 expression profile in cell lines**

Expression profile of BIG3 in various cell lines. Actin was used as a loading control.
