# Supplementary material
Source: PubMed Central journal article supplement (PMC4197882)
Supplement: embr0015-0714-sd3.pdf [file embr0015-0714-sd3.pdf]

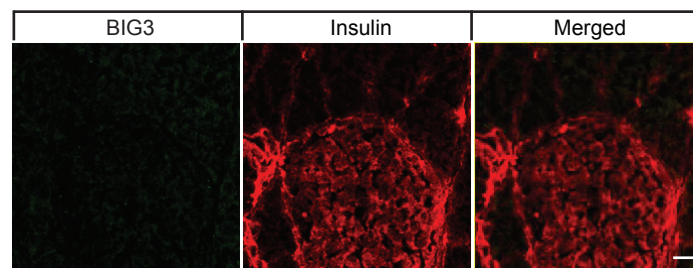

**Figure S3. Expression profile of selected marks in cells and islets**

Immunostaining of BKO pancreas cryo-section by using BIG3 and insulin antibodies.

Scale bar = 50  $\mu$ m.
