# Supplementary material
Source: PubMed Central journal article supplement (PMC4197882)
Supplement: embr0015-0714-sd4.pdf [file embr0015-0714-sd4.pdf]

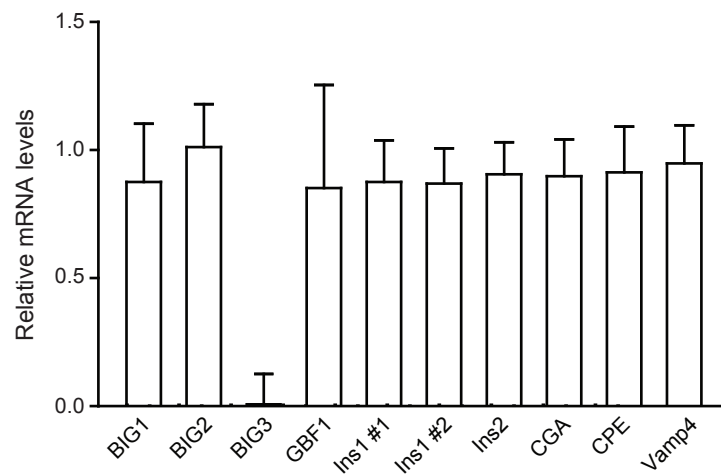

**Figure S4. Relative mRNA levels in BIG3 knockout islets**

Quantitative realtime PCR showing relative mRNA levels of BIG1, BIG2, BIG3, GBF1 (Golgi-specific Brefeldin A-resistance guanine nucleotide exchange factor 1), Ins1 (probe#1), Ins1 (probe#2), Ins2, CGA, CPE (carboxypeptidase E) and Vamp4 (vesicle-associated membrane protein 4) in BKO islets. qPCR measurements were first normalized to GAPDH and presented as fold change over the control islets. Data are presented as mean ± SEM. N = 3 independent islet isolation, each measured in triplicates.
