# Supplementary material
Source: PubMed Central journal article supplement (PMC4197882)

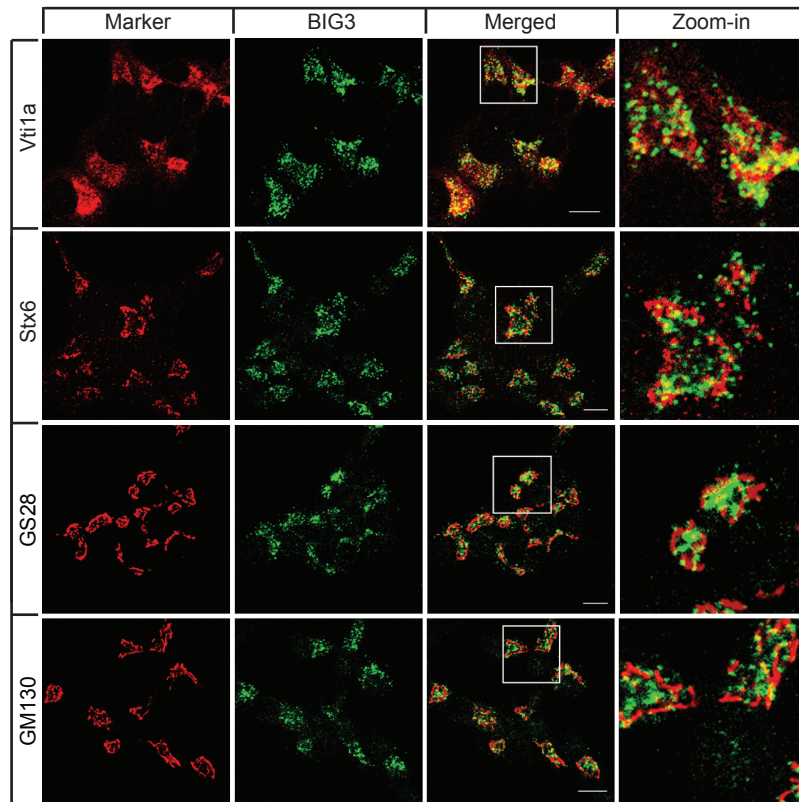

**Figure S5. Localization of BIG3 protein in the Golgi.**

Supplement: embr0015-0714-sd5.pdf [file embr0015-0714-sd5.pdf]
